# Supplementary material for: Vertical Dentofacial Skeletal Divergency Is Not Linked with Oral Health-Related Quality of Life
Source: MDPI journal article supplement (doi:10.3390/jcm13030665), 2024-01-24
Supplement: s1 [file s1]

**Table S2.** Comparison of sagittal differences (through ANB angle) between vertical dimension categories.

| Variable | SN - MP      |              |         | FH - MP       |                |         | PP - MP      |              |         | ODI          |              |         |
|----------|--------------|--------------|---------|---------------|----------------|---------|--------------|--------------|---------|--------------|--------------|---------|
|          | Hyper        | Normo        | p-value | Hyper         | Normo          | p-value | Hyper        | Normo        | p-value | Hyper        | Normo        | p-value |
|          | (n = 27)     | (n = 54)     |         | (n = 45)      | (n = 42)       |         | (n = 39)     | (n = 53)     |         | (n = 28)     | (n = 57)     |         |
| ANB      | 4.3<br>(2.7) | 3.2<br>(2.4) | 0.519   | 4.6<br>(2.63) | 3.51<br>(2.49) | 0.572   | 4.2<br>(2.8) | 3.6<br>(2.3) | 0.317   | 2.0<br>(2.8) | 4.2<br>(2.3) | 0.143   |

SN-MP - Sella-Nasion plane - Mandibular Plane; FH-MP - Frankfort Horizontal Plane - Mandibular Plane; PP-MP - Palatal Plane - Mandibular Plane; ODI - Overbite Depth Indicator; Hyper - Hyperdivergent; Normo - Normodivergent; SD - Standard Deviation.

\* Mann-Whitney for continuous variables, chi-square test for categorical variables,  $p < 0.05$  denoted in bold.
